# Supplementary material
Source: PubMed Central journal article supplement (PMC8962722)
Supplement: ntab233_suppl_supplementary_file_2.pdf [file ntab233_suppl_supplementary_file_2.pdf]

**Supplementary File 2 – Pearson’s Chi-square test of homogeneity**

| <b>Variable Distribution:<br/>Comparison Pre-Telehealth to<br/>Telehealth</b>  | <b>Chi-Square<br/>(df)</b> | <b>Number of<br/>Cases<br/>Analyzed<br/>(case<br/>type)</b> | <b>P value<sup>a</sup></b> | <b>Interpretation</b>                                                                                                                                                                               |
|--------------------------------------------------------------------------------|----------------------------|-------------------------------------------------------------|----------------------------|-----------------------------------------------------------------------------------------------------------------------------------------------------------------------------------------------------|
| Age (<65, ≥65)                                                                 | 14.8(1)                    | 3236<br>(patients)                                          | <.001                      | A significant difference in the distribution of these two populations was found with the telehealth population having proportionally more patients <65 years than the pre-telehealth population.    |
| Gender (M, F)                                                                  | 1.1(1)                     | 3236<br>(patients)                                          | .29                        | No significant difference in distribution of this variable in these two populations was found                                                                                                       |
| Race (High Risk for COVID-19, Not High Risk for COVID-19)                      | 0.003(1)                   | 3236<br>(patients)                                          | .95                        | No significant difference in distribution of this variable in these two populations was found.                                                                                                      |
| Ethnicity (Hispanic/Latinx, Not Hispanic/Latinx)                               | 4.1(1)                     | 3236<br>(patients)                                          | 0.04                       | A significant difference in the distribution of these two populations was found with the telehealth population having proportionately more Hispanic/Latinx patients.                                |
| Insurance <sup>b</sup> (General Health Insurance, No General Health Insurance) | 2.4(1)                     | 3236<br>(patients)                                          | .12                        | No significant difference in distribution of this variable in these two populations was found.                                                                                                      |
| Visit Type (Outreach Only, Counseling)                                         | 30.2(1)                    | 3879<br>(all visits)                                        | <.001                      | A significant difference in the distribution of these two populations was found with the telehealth population having proportionally more outreach only visits than the pre-telehealth population.  |
| Medication (Accepted, Declined)                                                | 10.7(1)                    | 2750<br>(counseling visits)                                 | .001                       | A significant difference in the distribution of these two populations was found with the pre-telehealth population having proportionally more medication acceptances than the telehealth population |
| Medication Accepted - Age                                                      | 1.6(1)                     | 1488<br>(counseling visits)                                 | .21                        | No significant difference in distribution of this variable in these two populations was found.                                                                                                      |
| Medication Accepted –Gender                                                    | 0.1(1)                     | 1488<br>(counseling visits)                                 | .82                        | No significant difference in distribution of this variable in these two populations was found.                                                                                                      |
| Medication Accepted –Race                                                      | 0.2(1)                     | 1488<br>(counseling visits)                                 | .66                        | No significant difference in distribution of this variable in these two populations was found.                                                                                                      |
| Medication Accepted - Insurance                                                | 2.0(1)                     | 1488<br>(counseling visits)                                 | .16                        | No significant difference in distribution of this variable in these two populations was found.                                                                                                      |

**Supplementary File 2. Pearson’s Chi-square Analysis for Homogeneity (without Correction)**

<sup>a</sup>Significance level of P value<.05
